# Supplementary material for: Controlled self-assemblies of clay silicate platelets by organic salt modifier
Source: Royal Society of Chemistry journal article supplement (doi:10.1039/c2ra20687k), 2012-01-01
Supplement: c2ra20687k.pdf [file c2ra20687k.pdf]

# Electronic Supplementary Material

## Controlled self-assemblies of clay silicate platelets by organic salt modifier†

Chih-Wei Chiu,<sup>a</sup> Tzu-Chien Lee,<sup>b</sup> Po-Da Hong\*<sup>a</sup> and Jiang-Jen Lin\*<sup>b</sup>

<sup>a</sup>*Department of Materials Science and Engineering, National Taiwan University of Science and Technology, Taipei 10607, Taiwan. E-mail: [poda@mail.ntust.edu.tw](mailto:poda@mail.ntust.edu.tw)*

<sup>b</sup>*Institute of Polymer Science and Engineering, National Taiwan University, Taipei 10617, Taiwan. E-mail: [jianglin@ntu.edu.tw](mailto:jianglin@ntu.edu.tw)*

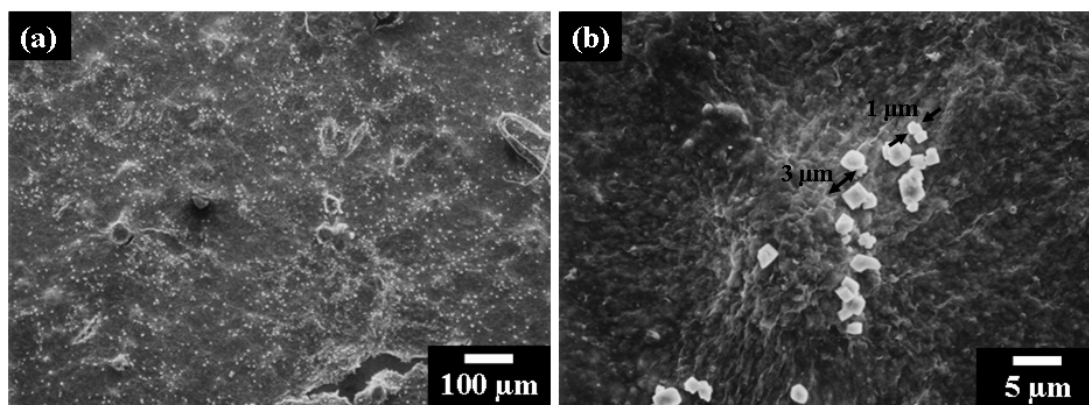

**Fig. S1** SEM micrographs of the cubes from the self-piling of NSP/DGA (equivalent ratio 1:0.5) at different magnifications.

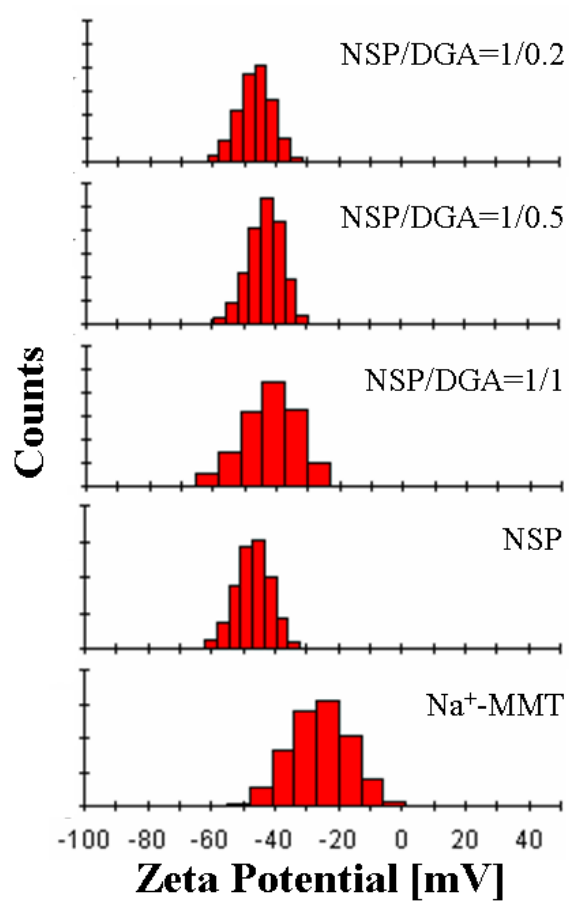

**Fig. S2** Zeta potentials of NSP/DGA complex (0.01 wt %) in water.
